# Supplementary material
Source: PubMed Central journal article supplement (PMC3645532)
Supplement: 1222706110_pnas.201222706SI.pdf [file 1222706110_pnas.201222706SI.pdf]

# Supporting Information

Imperi et al. 10.1073/pnas.1222706110

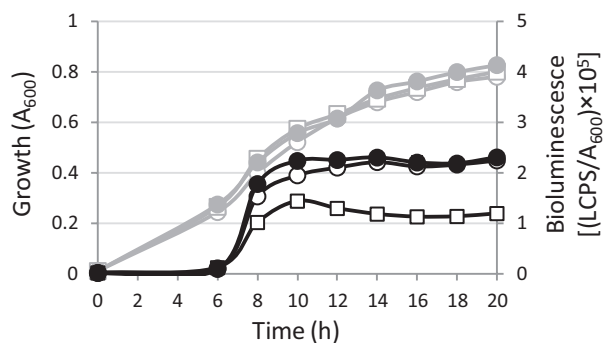

**Fig. S1.** Response of the PvdS-dependent *pvdE* promoter (*PpvdE*)::*lux* reporter to pyoverdine signaling. Bacterial growth (gray lines, left y axis) and bioluminescence emission (black lines, right y axis) of PAO1 *PpvdE*::*lux* (filled circles), PAO1*pvdA PpvdE*::*lux* (open squares), and PAO1*pvdA PpvdE*::*lux* plus 10  $\mu$ M exogenously added pyoverdine (open circles) cultured in TSBD medium at 37 °C in microtiter plates. Values represent the mean of five independent assays (SD < 9% of the mean values).

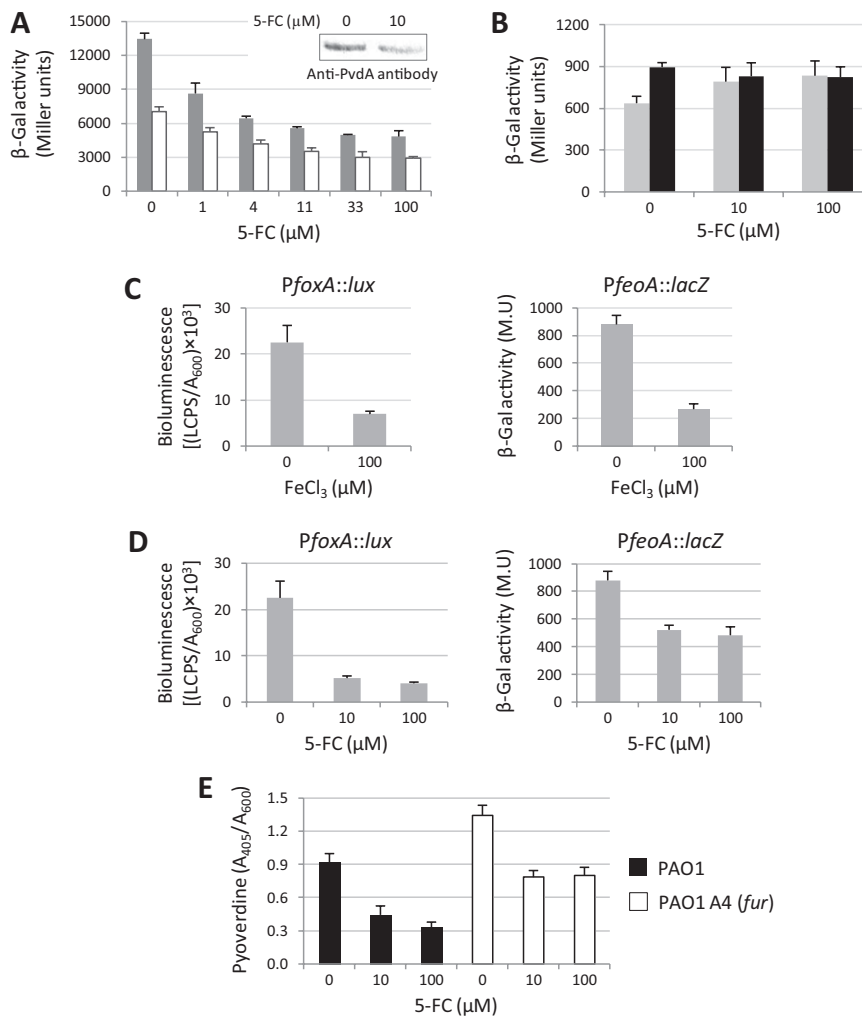

**Fig. S2.** 5-Fluorocytosine (5-Fc) specifically inhibits transcription of iron-dependent genes. (A) Effect of 5-Fc (0–100  $\mu$ M) on  $\beta$ -gal expression by PAO1 *PpvdA::lacZ* (gray bars) and PAO1 *PpvdD::lacZ* (white bars) at 14 h of growth in TSBD. Inset shows a representative anti-PvdA Western blot on whole-cell lysates from 5-Fc-treated or -untreated *Pseudomonas aeruginosa* PAO1 cells grown for 14 h in TSBD. (B) Effect of 5-Fc (0–100  $\mu$ M) on  $\beta$ -gal expression by PAO1 *PproC::lacZ* at 8 and 14 h of growth (gray and black bars, respectively) in TSBD. Values represent the mean ( $\pm$  SD) of at least three independent assays. (C) Bioluminescence emission by PAO1 *PfoxA::lux* (Left) and  $\beta$ -gal expression by PAO1 *PfeoA::lacZ* (Right) at 14 h of growth in TSBD supplemented or not supplemented with 100  $\mu$ M  $FeCl_3$ . (D) Effect of 5-Fc (0–100  $\mu$ M) on bioluminescence emission by PAO1 *PfoxA::lux* (Left) and  $\beta$ -gal expression by PAO1 *PfeoA::lacZ* (Right) at 14 h of growth in TSBD. (E) Effect of 5-Fc (0–100  $\mu$ M) on pyoverdine production by PAO1 and the *fur* mutant PAO1 A4 expressing a Fur variant, which is strongly impaired in iron-dependent gene repression (1), at 14 h of growth in TSBD. Values represent the mean ( $\pm$  SD) of at least three independent assays.

1. Barton HA, Johnson Z, Cox CD, Vasil AI, Vasil ML (1996) Ferric uptake regulator mutants of *Pseudomonas aeruginosa* with distinct alterations in the iron-dependent repression of exotoxin A and siderophores in aerobic and microaerobic environments. *Mol Microbiol* 21(5):1001–1017.



**Table S2. Bacterial strains and plasmids used in this study**

| Strain                    | Genotype and/or relevant characteristics                                                                                         | Source    |
|---------------------------|----------------------------------------------------------------------------------------------------------------------------------|-----------|
| <i>P. aeruginosa</i>      |                                                                                                                                  |           |
| PAO1                      | WT (prototroph), type I pyoverdine producer                                                                                      | ATCC      |
| 7NSK2                     | Type II pyoverdine producer (type IIa pyoverdine receptor)                                                                       | 1         |
| ATCC27853                 | Type II pyoverdine producer (type IIb pyoverdine receptor)                                                                       | 1         |
| LESB58                    | Type III pyoverdine producer                                                                                                     | 2         |
| PAO1 <pvds< p=""></pvds<> | PAO1 $\Delta$ pvdS, Gm <sup>R</sup>                                                                                              | This work |
| PAO1codA                  | PAO1 $\Delta$ codA, in-frame deletion mutant in the codA (PA0437) gene                                                           | This work |
| PAO1codB                  | PAO1 $\Delta$ codB, in-frame deletion mutant in the codB (PA0438) gene                                                           | This work |
| PAO1pvdA                  | PAO1 $\Delta$ pvdA                                                                                                               | 3         |
| K1660                     | K767 $\Delta$ fpvA                                                                                                               | 4         |
| PAO1fpvR                  | PAO1 fpvR::Km <sup>R</sup>                                                                                                       | 5         |
| PAO1 A4                   | PAO1 carrying a fur mutation resulting in the H86→Y substitution in the Fur protein                                              | 6         |
| <i>Escherichia coli</i>   |                                                                                                                                  |           |
| DH5 $\alpha$ F'           | recA1 endA1 hsdR17 supE44 thi-1 gyrA96 relA1 $\Delta$ (lacZYA-argF)U169 [ $\Phi$ 80d lacZ $\Delta$ M15] NaI <sup>R</sup>         | 7         |
| S17-1 $\lambda$ pir       | TpR SmR recA, thi, pro, hsdR-M+RP4: 2-Tc:Mu: Km <sup>m</sup> Tn7 $\lambda$ pir                                                   | 8         |
| Plasmid                   |                                                                                                                                  |           |
| pEX18Tc                   | pMB1 replicon, oriT sacB lacZ $\alpha$ , Mob <sup>+</sup> Tc <sup>r</sup> , allelic exchange vector                              | 9         |
| pPS858                    | Ap <sup>r</sup> ; source of Gm <sup>r</sup> -GFP cassette                                                                        | 9         |
| pUCP18                    | <i>E. coli</i> - <i>Pseudomonas</i> shuttle vector; Ap/Cb <sup>R</sup>                                                           | 10        |
| pDM4                      | Suicide vector; sacBR, oriR6K; Cm <sup>R</sup>                                                                                   | 11        |
| Mini-CTX-lux              | Promoter-probe vector containing the luxCDABE operon; Tc <sup>R</sup>                                                            | 12        |
| Mini-CTX-PpvdE::lux       | Plasmid to insert a PpvdE::lux fusion into the chromosome of <i>P. aeruginosa</i> ; Tc <sup>R</sup>                              | This work |
| pEX $\Delta$ pvdS         | pEX18Tc derivative carrying the Gm <sup>r</sup> -GFP cassette between flanking regions of the pvdS coding sequence               | This work |
| pDM4 $\Delta$ codA        | pDM4 derivative carrying the flanking regions of the codA coding sequence                                                        | This work |
| pDM4 $\Delta$ codB        | pDM4 derivative carrying the flanking regions of the codB coding sequence                                                        | This work |
| pUCPcodA                  | pUCP18 derivative carrying the entire codA coding sequence under the control of the P <sub>T5</sub> lacO region                  | This work |
| pUCPcodB                  | pUCP18 derivative carrying the entire codB coding sequence under the control of the P <sub>T5</sub> lacO region                  | This work |
| pUCPpvdS                  | pUCP18 derivative carrying the entire pvdS coding sequence under the control of the P <sub>T5</sub> lacO region; Ap <sup>R</sup> | 13        |
| pMP220::PpvdA             | pMP220 derivative carrying a PpvdA::lacZ transcriptional fusion; Tc <sup>R</sup>                                                 | 13        |
| pMP190::PpvdD             | pMP190 derivative carrying a PpvdD::lacZ transcriptional fusion; Cm <sup>R</sup>                                                 | 14        |
| pMP190::PpvdE             | pMP190 derivative carrying a PpvdE::lacZ transcriptional fusion; Cm <sup>R</sup>                                                 | 14        |
| pPZ-pvdS                  | pPZTC derivative carrying a PpvdS::lacZ transcriptional fusion; Cb <sup>R</sup>                                                  | 15        |
| pPZ-toxA                  | pPZ20 derivative carrying a PtoxA::lacZ translational fusion; Cb <sup>R</sup>                                                    | 5         |
| pPZ-prpL                  | pPZTC derivative carrying a PprpL::lacZ transcriptional fusion; Cb <sup>R</sup>                                                  | 5         |
| pMP220::PpchR             | pMP220 derivative carrying a PpchR::lacZ transcriptional fusion; Tc <sup>R</sup>                                                 | This work |
| pMP220::PfeoA             | pMP220 derivative carrying a PfeoA::lacZ transcriptional fusion; Tc <sup>R</sup>                                                 | This work |
| pME6425                   | Translational pchE'-lacZ fusion, Tc <sup>R</sup>                                                                                 | 16        |
| pME3641                   | Plasmid carrying a translational PproC::lacZ fusion, Cb <sup>R</sup>                                                             | 17        |
| Mini-CTX-lux::PfoxA       | Plasmid to insert a PfoxA::lux fusion into the chromosome of <i>P. aeruginosa</i> ; TcR                                          | 18        |

- Bodilis J, et al. (2009) Distribution and evolution of ferripyoverdine receptors in *Pseudomonas aeruginosa*. *Environ Microbiol* 11(8):2123–2135.
- Kukavica-Ibrulj I, et al. (2008) In vivo growth of *Pseudomonas aeruginosa* strains PAO1 and PA14 and the hypervirulent strain LESB58 in a rat model of chronic lung infection. *J Bacteriol* 190(8):2804–2813.
- Imperi F, et al. (2008) Membrane-association determinants of the omega-amino acid monooxygenase PvdA, a pyoverdine biosynthetic enzyme from *Pseudomonas aeruginosa*. *Microbiology* 154(Pt 9):2804–2813.
- Shen J, Meldrum A, Poole K (2002) FpvA receptor involvement in pyoverdine biosynthesis in *Pseudomonas aeruginosa*. *J Bacteriol* 184(12):3268–3275.
- Lamont IL, Beare PA, Ochsner U, Vasil AI, Vasil ML (2002) Siderophore-mediated signaling regulates virulence factor production in *Pseudomonas aeruginosa*. *Proc Natl Acad Sci USA* 99(10):7072–7077.
- Barton HA, Johnson Z, Cox CD, Vasil AI, Vasil ML (1996) Ferric uptake regulator mutants of *Pseudomonas aeruginosa* with distinct alterations in the iron-dependent repression of exotoxin A and siderophores in aerobic and microaerobic environments. *Mol Microbiol* 21(5):1001–1017.
- Liss L (1987) New M13 host: DH5 F' competent cells. *Focus* 9:13.
- Simon R, Priefer U, Puhler A (1983) A broad host range mobilization system for in vivo genetic engineering: Transposon mutagenesis in Gram-negative bacteria. *Biotechnology (NY)* 1:784–791.
- Hoang TT, Karkhoff-Schweizer RR, Kutchma AJ, Schweizer HP (1998) A broad-host-range Flp-FRT recombination system for site-specific excision of chromosomally-located DNA sequences: Application for isolation of unmarked *Pseudomonas aeruginosa* mutants. *Gene* 212(1):77–86.
- Schweizer HP (1991) *Escherichia-Pseudomonas* shuttle vectors derived from pUC18/19. *Gene* 97(1):109–121.
- Milton DL, O'Toole R, Horstedt P, Wolf-Watz H (1996) Flagellin A is essential for the virulence of *Vibrio anguillarum*. *J Bacteriol* 178(5):1310–1319.
- Becher A, Schweizer HP (2000) Integration-proficient *Pseudomonas aeruginosa* vectors for isolation of single-copy chromosomal lacZ and lux gene fusions. *Biotechniques* 29(5):948–950, 952.
- Ambrosi C, Tiburzi F, Imperi F, Putignani L, Visca P (2005) Involvement of AlgQ in transcriptional regulation of pyoverdine genes in *Pseudomonas aeruginosa* PAO1. *J Bacteriol* 187(15):5097–5107.
- Cunliffe HE, Merriman TR, Lamont IL (1995) Cloning and characterization of pvdS, a gene required for pyoverdine synthesis in *Pseudomonas aeruginosa*: PvdS is probably an alternative sigma factor. *J Bacteriol* 177(10):2744–2750.
- Ochsner UA, Wilderman PJ, Vasil AI, Vasil ML (2002) GeneChip expression analysis of the iron starvation response in *Pseudomonas aeruginosa*: Identification of novel pyoverdine biosynthesis genes. *Mol Microbiol* 45(5):1277–1287.
- Reimann C, Serino L, Beyeler M, Haas D (1998) Dihydroaeruginosic acid synthetase and pyochelin synthetase, products of the pchEF genes, are induced by extracellular pyochelin in *Pseudomonas aeruginosa*. *Microbiology* 144(Pt 11):3135–3148.
- Savioz A, Zimmermann A, Haas D (1993) *Pseudomonas aeruginosa* promoters which contain a conserved GG-N10-GC motif but appear to be RpoN-independent. *Mol Gen Genet* 238(1–2):74–80.
- Mettrick KA, Lamont IL (2009) Different roles for anti-sigma factors in siderophore signalling pathways of *Pseudomonas aeruginosa*. *Mol Microbiol* 74(5):1257–1271.
